# Supplementary material for: Food effect risk assessment in preformulation stage using material sparing μFLUX methodology
Source: PubMed Central journal article supplement (PMC9793460; doi:10.5599/admet.1476), 2022-10-07
Supplement: ADMET-10-1476-S1.pdf [file ADMET-10-1476-S1.pdf]

## SUPPORTING INFORMATION

### Food effect risk assessment in preformulation stage using material sparing $\mu$ FLUX methodology

Corinne Jankovsky<sup>1\*</sup>, Oksana Tsinman<sup>2</sup>, Naveen K. Thakral<sup>1\*#</sup>

1. Boehringer Ingelheim Pharmaceuticals, Inc., 900 Ridgebury Road, Ridgefield, Connecticut 06877, United States

2. Pion Inc., 10 Cook St. Billerica, Massachusetts 01821, USA

\*Corresponding Authors

#Presently at: Schrodinger, Inc., 1540 Broadway, New York, New York 10036, United States

doi: <https://doi.org/10.5599/admet.1476>

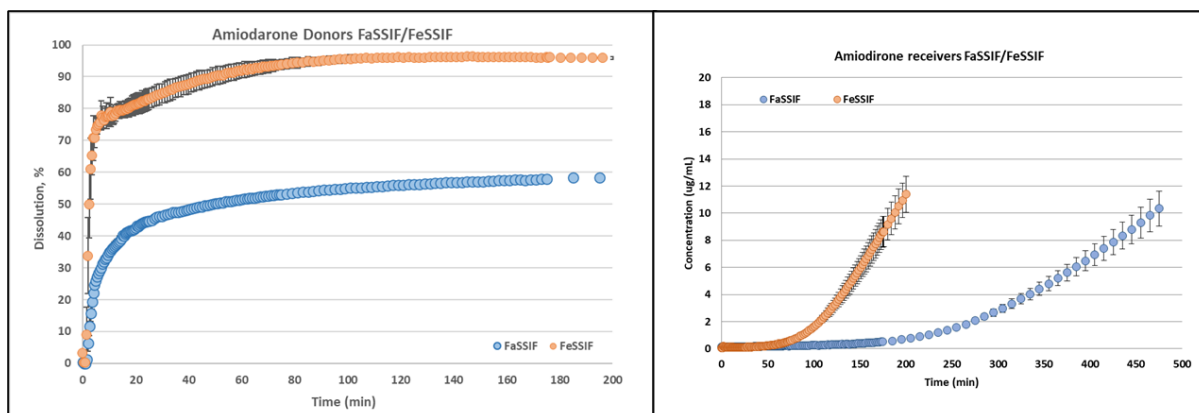

Figure S1: Amiodarone concentration in Donor (dissolution) and Receiver chambers: FaSSiF vs FeSSiF

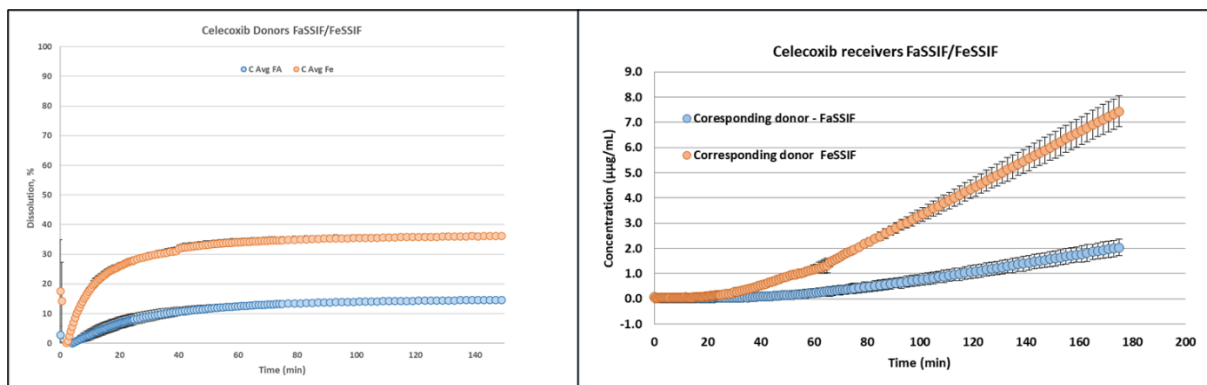

Figure S2: Celecoxib concentration in Donor (dissolution) and Receiver chambers: FaSSiF vs FeSSiF

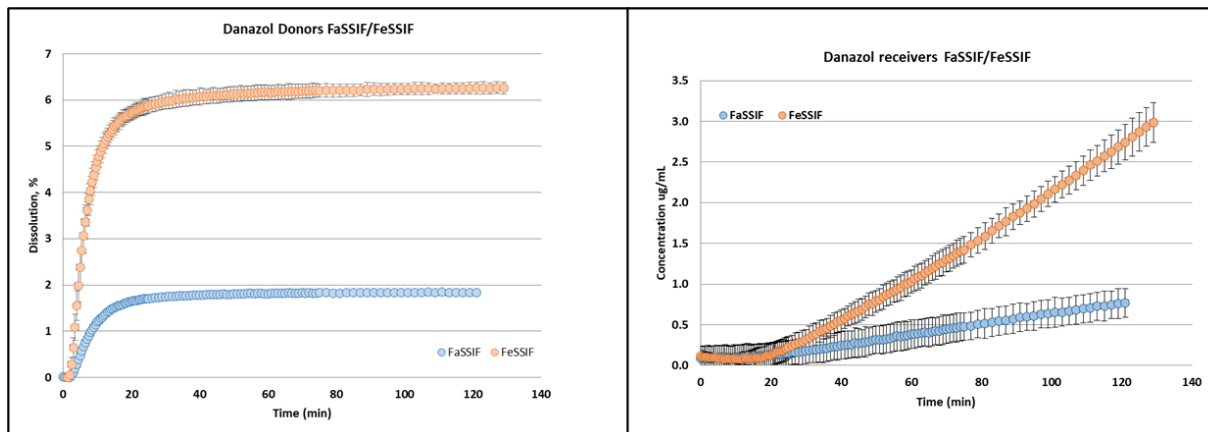

Figure S3: Danazol concentration in Donor (dissolution) and Receiver chambers: FaSSiF vs FeSSiF

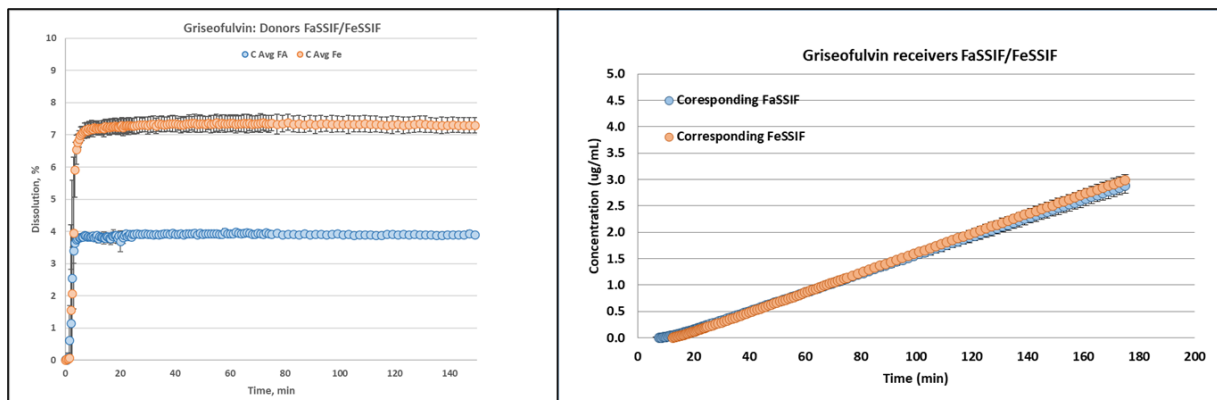

Figure S4: Griseofulvin concentration in Donor (dissolution) and Receiver chambers: FaSSiF vs FeSSiF

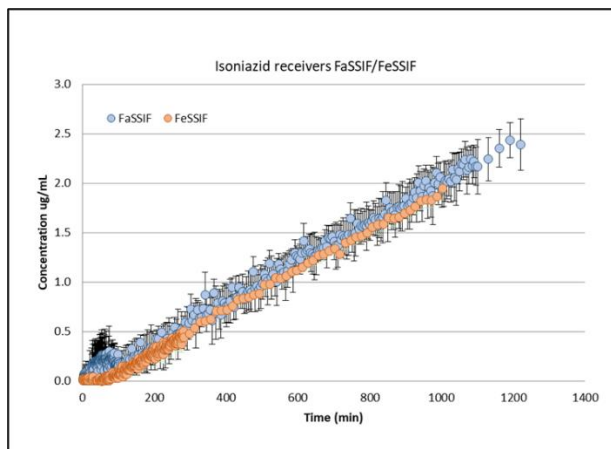

Figure S5: Isoniazid concentration in Receiver chamber: FaSSiF vs FeSSiF. Isoniazid was 100% dissolved in donor chamber within 30 seconds

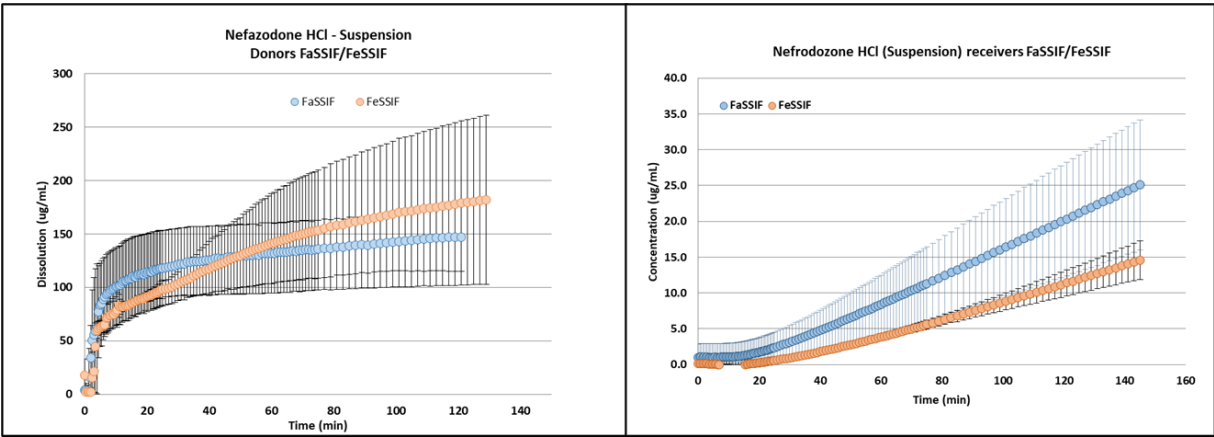

Figure S6: Nefazodone concentration in Donor (dissolution) and Receiver chambers: FaSSiF vs FeSSiF

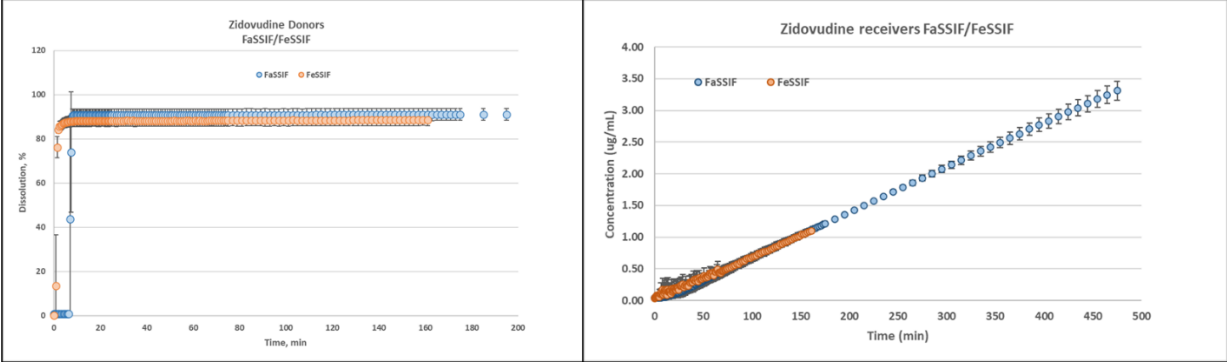

Figure S7: Zidovudine concentration in Donor (dissolution) and Receiver chambers: FaSSiF vs FeSSiF

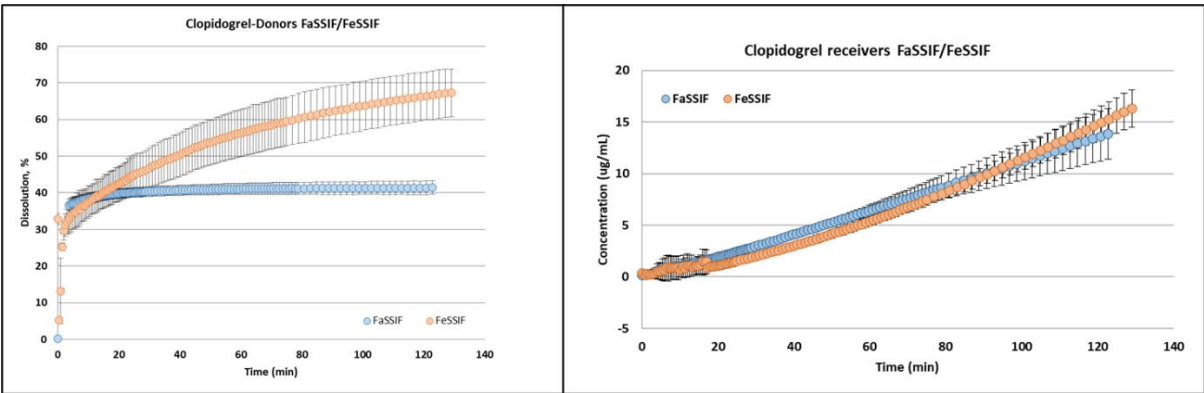

Figure S8: Clopidogrel concentration in Donor (dissolution) and Receiver chambers: FaSSiF vs FeSSiF

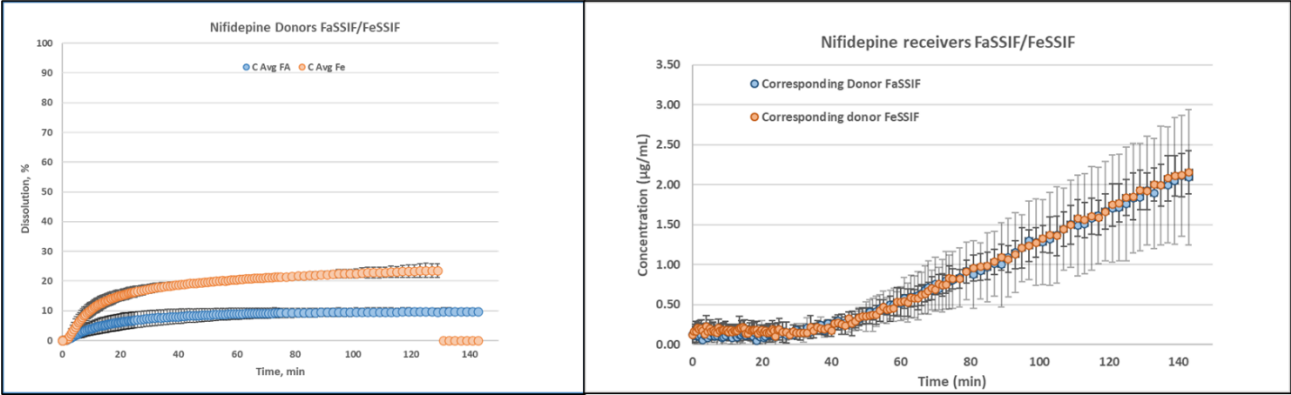

Figure S9: Nifedipine concentration in Donor (dissolution) and Receiver chambers: FaSSiF vs FeSSiF

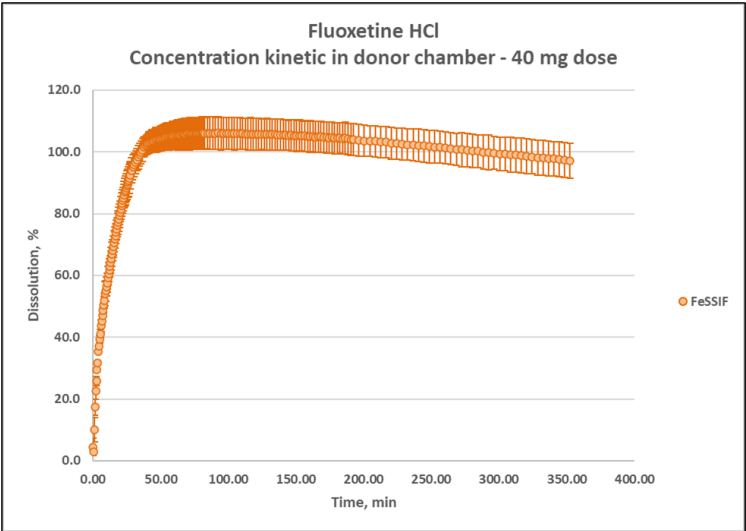

Figure S10: Fluoxetine HCl concentration in Donor (dissolution)
